# Supplementary material for: Analyses of cancer incidence and other morbidities in gamma irradiated B6CF1 mice
Source: PubMed Central journal article supplement (PMC7440931; doi:10.1371/journal.pone.0231510), 2020-08-20
Supplement: pone.0231510.s002.pdf [file pone.0231510.s002.pdf]

# Supplementary figures and tables

**Analyses of cancer incidence and other morbidities in gamma irradiated B6CF1 mice.**

**Alia Zander<sup>1</sup>, Tatjana Paunesku<sup>1</sup>, Gayle Woloschak<sup>1</sup>**

<sup>1</sup>Northwestern University, Feinberg School of Medicine, Radiation Oncology, Chicago, IL

# List of supplementary tables and figures

- Table S1: censored mice
- Table S2: filtered mice
- Table S3: robustness test for controls analysis
- Table S4: Janus codes to match IES codes
- Table S5: Janus conditions for mice used in IES comparison
- Table S6: control mice including 300 fractions – robustness tests
- Figure S1: controls analysis
- Figure S2: 300 fractions model (continuous + KM models, KM curve by COD)
- Figure S3: Robustness testing for Cox PH model with gamma irradiated mice
- Figure S4: KM curves for gamma irradiated mice
- Figure S5: Cause specific hazards – Lung tumors, non-thymic lymphoma, tumors minus lung
- Figure S6: CIF with 6Gy dose limit

# Supplementary Table S1: Cause of Death (COD) codes for censored mice and sample size for each group

**Supplementary Table S1:** Cause of Death (COD) codes for censored mice and the number of mice in each group.

| Mice Censored                    | # of mice |
|----------------------------------|-----------|
| COD – Accidental death           | 47        |
| COD – Escaped during irradiation | 8         |
| COD - Discarded                  | 207       |
| COD – Improper irradiation       | 77        |
| COD - Missing                    | 29        |
| COD – Sacrifice, programmed      | 19        |
| No lethal disease listed         | 936       |

# Supplementary Table S2: Data filtering for gamma analysis

**Supplementary Table S2:** Description of which mice were removed from our analysis, the corresponding reasoning, and the resulting sample size. N=4330 for control mice and N=7848 for gamma irradiated mice.

| Data removed                           | Reasoning                                                           | # of mice |
|----------------------------------------|---------------------------------------------------------------------|-----------|
| -                                      | -                                                                   | 50110     |
| JM11                                   | Not a true data set                                                 | 49,225    |
| JM10                                   | Different species – <i>Peromyscus leucopus</i>                      | 46,835    |
| JM14 mice treated with radioprotectors | Beyond the scope of our project                                     | 46,635    |
| Breeder mice                           | Held under different conditions                                     | 43,428    |
| JM2 mice                               | Held under different conditions                                     | 31,843    |
| COD – removal to another experiment    | Mice listed under different experiment, do not want to double count | 28,153    |
| JM12 mice                              | Controls analysis showed significant difference                     | 27,553    |
| JM3 mice                               | Controls analysis showed significant difference                     | 24,478    |
| Mice irradiated with 300 fractions     | Controls analysis showed significant difference                     | 23,953    |
| JM8 mice                               | Experimental design – separate analysis required                    | 22,626    |
| Neutron irradiated mice                | Different radiation quality - separate analysis                     | 12178     |

# Supplementary Figure S1: Cox PH model predicted graphs and table output for controls after filtering

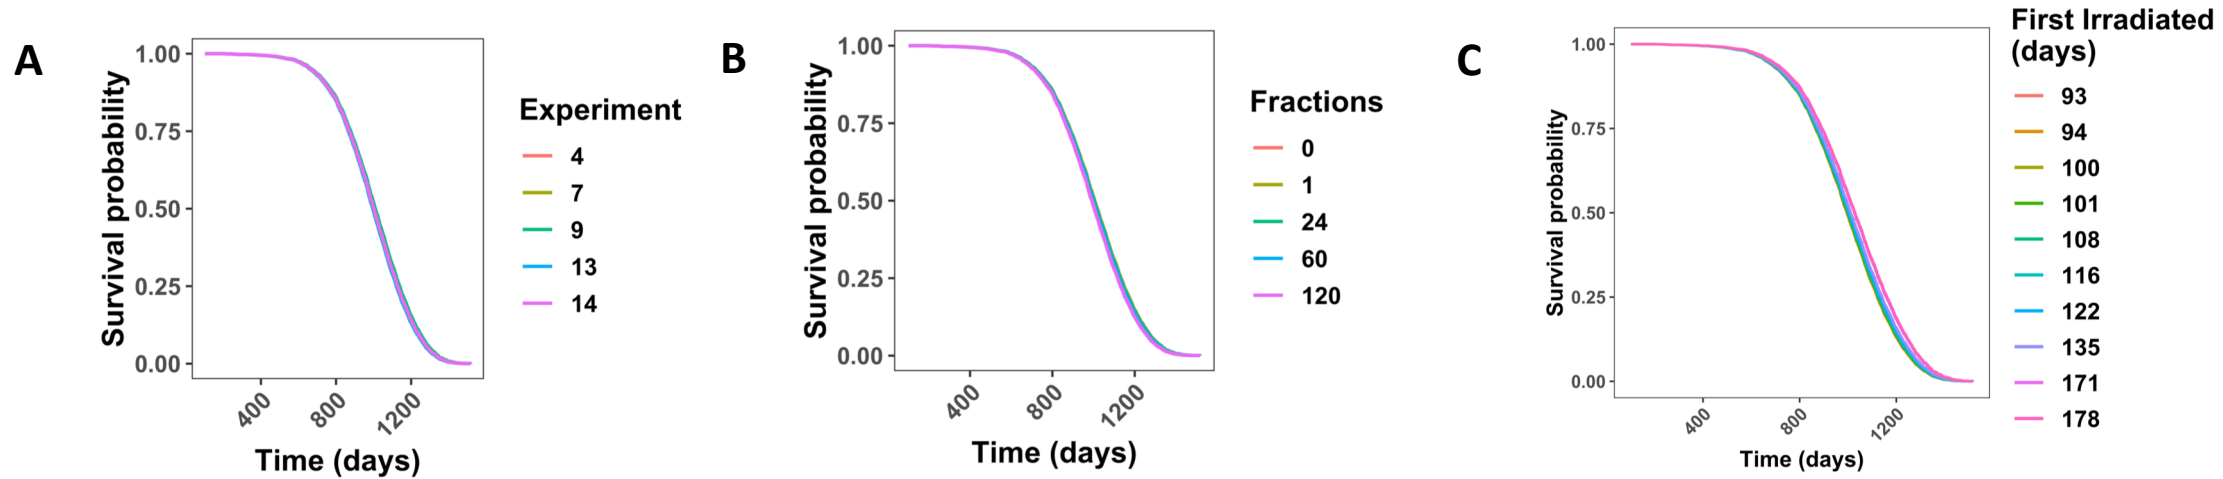

**D**

| Model Group | Independent Variable | Parameter Estimate | Hazard Ratio (95% CI) | P-value      |
|-------------|----------------------|--------------------|-----------------------|--------------|
| A           | Sex                  | -0.119             | 0.888 (0.83, 0.949)   | <b>0.001</b> |
| A           | Expt 7               | 0.025              | 1.025 (0.914, 1.15)   | 0.67         |
| A           | Expt 9               | -0.057             | 0.945 (0.863, 1.035)  | 0.225        |
| A           | Expt 13              | 0.02               | 1.021 (0.932, 1.118)  | 0.659        |
| A           | Expt 14              | -0.009             | 0.991 (0.877, 1.12)   | 0.884        |
| B           | Sex                  | -0.11              | 0.896 (0.839, 0.957)  | <b>0.001</b> |
| B           | Fractions            | 0.001              | 1.0007 (1, 1.002)     | 0.17         |
| C           | Sex                  | -0.096             | 0.908 (0.85, 0.96)    | <b>0.003</b> |
| C           | First Irradiated     | -0.002             | 0.998 (0.995, 1.001)  | 0.113        |

**Supplementary Figure S1:** Cox proportional hazard (PH) survival curves produced using all data filtered by the criteria in **Table 1** that also had a total dose of 0Gy. Age at death was used as a time scale with sex and **(A)** experiment, **(B)** number of fractions, or **(C)** the age first irradiated as independent variables. The predicted outcomes shown are for female mice. Parameter estimates and p-values from each model are shown in **D**. Kaplan Meier curves with **(E)** sex, **(F)** number of fractions, **(G)** age first irradiated, and **(H)** experiment group were evaluated to test the proportional hazards assumption of these models.

# Supplementary Figure S1: KM curves for control mice to validate Cox PH model

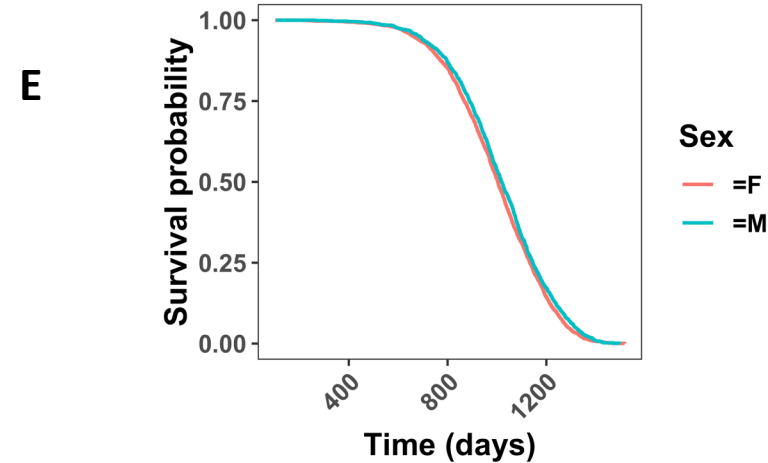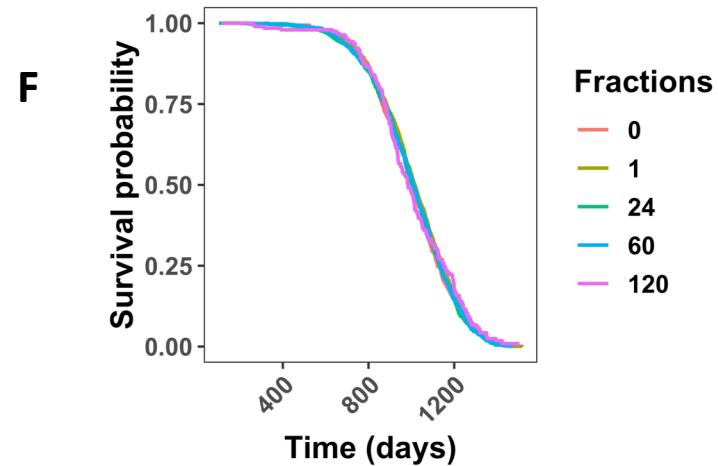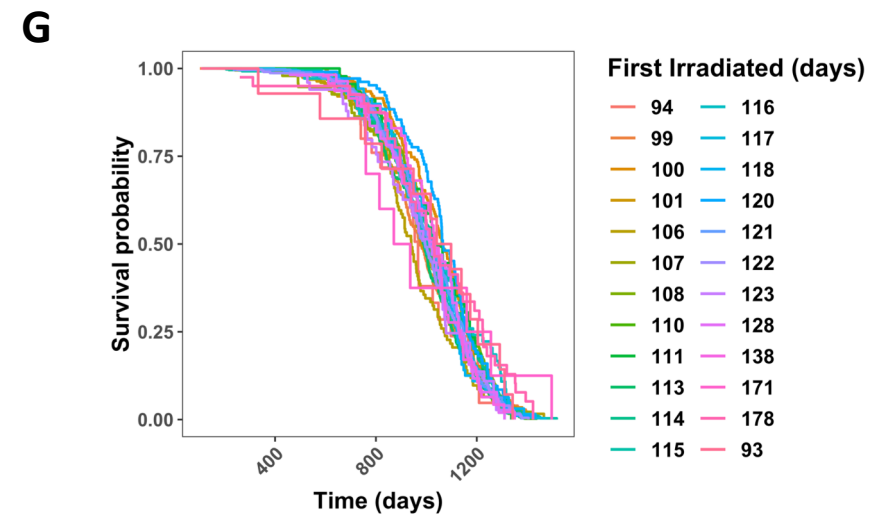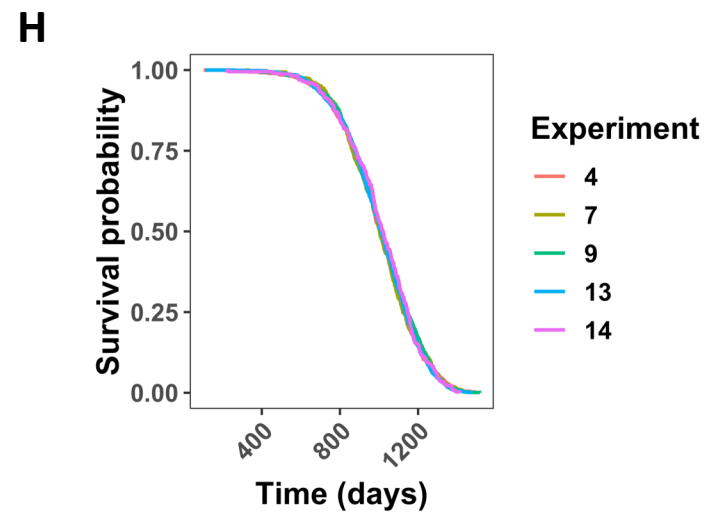

**Supplementary Figure S1:** Cox proportional hazard (PH) survival curves produced using all data filtered by the criteria in **Table 1** that also had a total dose of 0Gy. Age at death was used as a time scale with sex and **(A)** experiment, **(B)** number of fractions, or **(C)** the age first irradiated as independent variables. Parameter estimates and p-values from each model are shown in **D**. Kaplan Meier curves with **(E)** sex, **(F)** number of fractions, **(G)** age first irradiated, and **(H)** experiment group were evaluated to test the proportional hazards assumption of these models.

# Supplementary Table S3: Robustness analysis Cox PH Controls (supplemental methods shows models used for each)

**Supplementary Table S3:** Robustness tests for Cox Proportional Hazards models for controls analysis.

| Model Group | Independent Variable<br>(reference) | Parameter<br>Estimate | Hazard Ratio<br>(95% CI) | P            |
|-------------|-------------------------------------|-----------------------|--------------------------|--------------|
| D           | Sex - stratify                      | NA                    | NA                       | NA           |
| D           | Expt 7 (Expt 4)                     | 0.027                 | 1.027 (0.92, 1.15)       | 0.645        |
| D           | Expt 9 (Expt 4)                     | -0.056                | 0.945 (0.86, 1.04)       | 0.230        |
| D           | Expt 13 (Expt 4)                    | 0.0229                | 1.023 (0.93, 1.12)       | 0.621        |
| D           | Expt 14 (Expt 4)                    | -0.010                | 0.990 (0.88, 1.12)       | 0.876        |
| E           | Sex - stratify                      | NA                    | NA                       | NA           |
| E           | Fractions                           | 0.001                 | 1.001 (1.00, 1.002)      | 0.158        |
| F           | Sex - stratify                      | NA                    | NA                       | NA           |
| F           | First Irradiated                    | -0.002                | 0.998 (0.995, 1)         | 0.099        |
| G           | Sex                                 | -0.114                | 0.892 (0.83, 0.95)       | <b>0.001</b> |
| G           | Fractions 1 (Fractions 0)           | -0.083                | 0.921 (0.83, 1.03)       | 0.133        |
| G           | Fractions 24 (Fractions 0)          | -0.014                | 0.986 (0.88, 1.11)       | 0.808        |
| G           | Fractions 60 (Fractions 0)          | -0.004                | 0.996 (0.89, 1.11)       | 0.941        |
| G           | Fractions 120 (Fractions 0)         | -0.005                | 0.995 (0.84, 1.18)       | 0.955        |
| H           | Sex - stratify                      | NA                    | NA                       | NA           |
| H           | Fractions 1 (Fractions 0)           | -0.084                | 0.919 (0.83, 1.024)      | 0.126        |
| H           | Fractions 24 (Fractions 0)          | -0.017                | 0.983 (0.87, 1.11)       | 0.772        |
| H           | Fractions 60 (Fractions 0)          | -0.004                | 0.996 (0.89, 1.11)       | 0.947        |
| H           | Fractions 120 (Fractions 0)         | -0.005                | 0.995 (0.84, 1.19)       | 0.956        |

# Supplementary Table S4: Grouping B6CF1 Janus COD codes to match B6C3F1 IES categories

**Supplementary table S4:** Grouping B6CF1 Janus cause of death codes to match B6C3F1 IES categories

| New code name:      | Old code name(s): decoded (coded)                                                                                                                                                                                                            |
|---------------------|----------------------------------------------------------------------------------------------------------------------------------------------------------------------------------------------------------------------------------------------|
| Circulatory         | Vascular (TVAS), Heart (THRT), Spleen (TSPL)                                                                                                                                                                                                 |
| Digestive           | Caecum (TCEC), Colon (TCOL), Duodenum (TDUO), Esophagus (TESO), Ileum (TILE), Jejunum (TJEJ), Miscellaneous digestive system (TMID), Pancreas (TPAN), Salivary gland (TSGL), Stomach (TSTO), Tongue (TTGE), Gallbladder (TGBL), Liver (TLIV) |
| Endocrine           | Adrenal (TADR), Pituitary (TPIT), Thyroid (TTRD), Miscellaneous endocrine (TMIE), Hibernating gland (THIB), Miscellaneous glandular (TMIG), Preputial gland (TPPT)                                                                           |
| Hematopoietic       | Non-thymic lymphoma, generalized (NTYG), Non-thymic lymphoma, localized (NTYL), Thymic lymphoma, generalized (TTYG), Thymic lymphoma, localized (TTYL)                                                                                       |
| Mesothelium         | No match                                                                                                                                                                                                                                     |
| Nervous             | Brain (TBRN), Central nervous system (TCNS), Miscellaneous nervous system (TMIN), Peripheral nervous system (TPNS)                                                                                                                           |
| Male Reproductive   | Seminal vesicle (TSMV), Testis (TTST), Cowper's gland (TCGL), Epididymis (TEPI), Prostate (TPST)                                                                                                                                             |
| Female Reproductive | Ovary (TOVE), Mammary Gland (TMGL), Uterus (TUTE), Vagina (TVAG)                                                                                                                                                                             |
| Respiratory         | Lung (TADN), Miscellaneous lung (TMIL)                                                                                                                                                                                                       |
| Skeletal            | Bone (TBON)                                                                                                                                                                                                                                  |
| Skin                | Skin (TSKN)                                                                                                                                                                                                                                  |
| Soft Tissue         | Connective tissue/fibrosarcoma (TCON), Miscellaneous connective tissue (TMIC), Muscle (TMUS)                                                                                                                                                 |
| Special Sense Organ | Harderian gland (THGL)                                                                                                                                                                                                                       |
| Urinary             | Urinary bladder (TBLA), Kidney (TKID), Miscellaneous urogenital (TMUG)                                                                                                                                                                       |
| Non-neoplastic      | All Non-tumor codes                                                                                                                                                                                                                          |
| Unknown             | Cause of death unknown (CDU)                                                                                                                                                                                                                 |



# Supplementary Table S5: Janus experiments used for comparisons with IES chronic irradiation data

**Supplementary Table S5:** Janus experiments used for comparisons with IES chronic irradiation data

|         | Total Dose (Gy) | Fractions | Fractionation schedule | Dose Rate (cGy/min) | Time Irradiated (min) | Sample Size |
|---------|-----------------|-----------|------------------------|---------------------|-----------------------|-------------|
| Males   | 0               | Variable  | Variable               | 0                   | 0                     | 1724        |
|         | 9.2             | 24        | 1/week                 | .8516               | 45                    | 200         |
|         | 9.6             | 120       | 5/week                 | .006053             | 1320                  | 80          |
| Females | 0               | Variable  | Variable               | 0                   | 0                     | 2626        |
|         | .43             | 1         | N/A                    | 2.158               | 20                    | 350         |
|         | 7.74            | 24        | 1/week                 | .7164               | 45                    | 367         |

# Supplementary Figure S2 – CoxPH model validation for 300 fractions and KM curves showing differences in survival probability based on fraction number for each cause of death

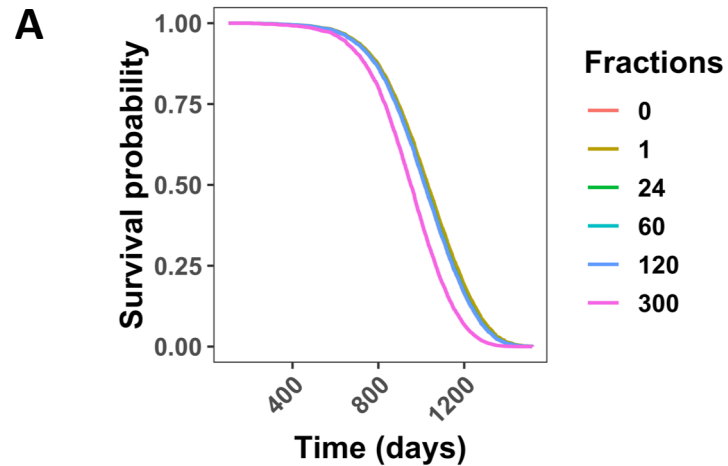

**B**

| Independent Variable | Estimate | Hazard Ratio (95% CI) | P-value          |
|----------------------|----------|-----------------------|------------------|
| sexM                 | -0.115   | 0.892 (0.83, 0.95)    | <b>0.001</b>     |
| Fractions 1          | -0.082   | 0.921 (0.83, 1.03)    | 0.134            |
| Fractions 24         | -0.014   | 0.986 (0.88, 1.11)    | 0.810            |
| Fractions 60         | -0.004   | 0.996 (0.89, 1.11)    | 0.946            |
| Fractions 120        | -0.005   | 0.995 (0.84, 1.18)    | 0.953            |
| Fractions 300        | 0.402    | 1.49 (1.25, 1.79)     | <b>&lt;0.001</b> |

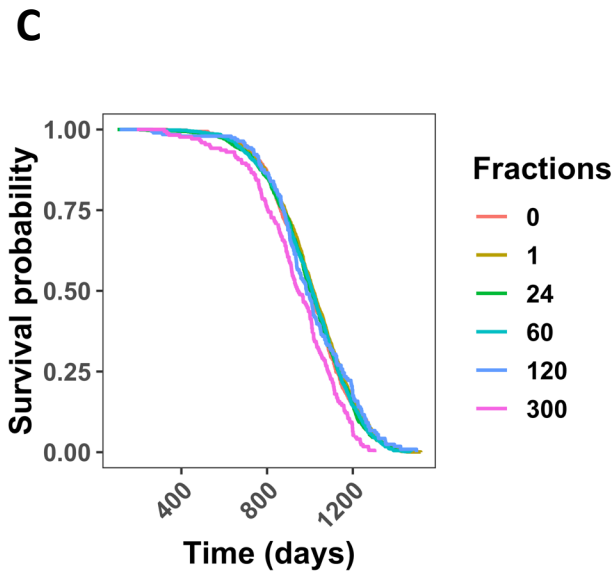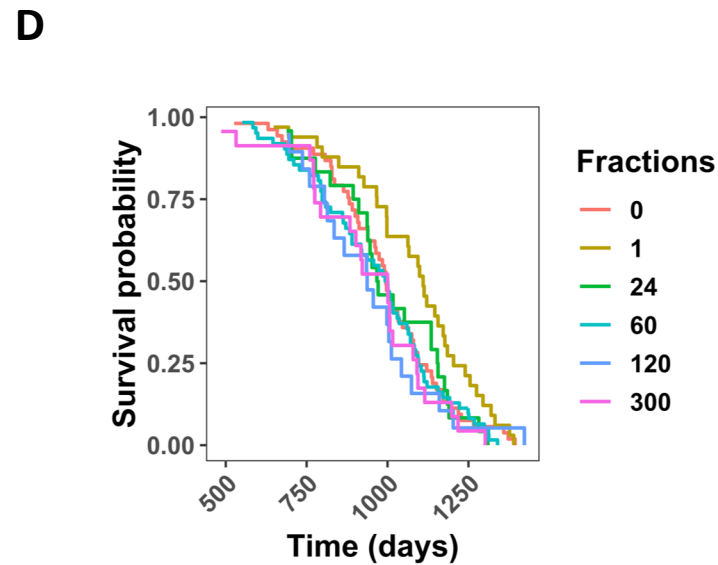

**Supplementary Figure S2:** Survival probability output from Cox PH model with sex and the number of fractions as a categorical variable control mice (**A/B**). The predicted outcomes shown (**A**) are for male mice. Kaplan Meier curve for control mice showing differences in survival probability based on the number of fractions used during sham irradiation treatment (**C**). Kaplan Meier curves showing how the number of fractions impacts survival in control male mice that died of solid tumors (excluding lung tumors) (**D**), lung tumors (**E**), lymphomas (**F**), non-tumor diseases (**G**), and CDU (**H**).

# Supplementary Figure S2 – CoxPH model validation for 300 fractions and KM curves showing differences in survival probability based on fraction number of each cause of death

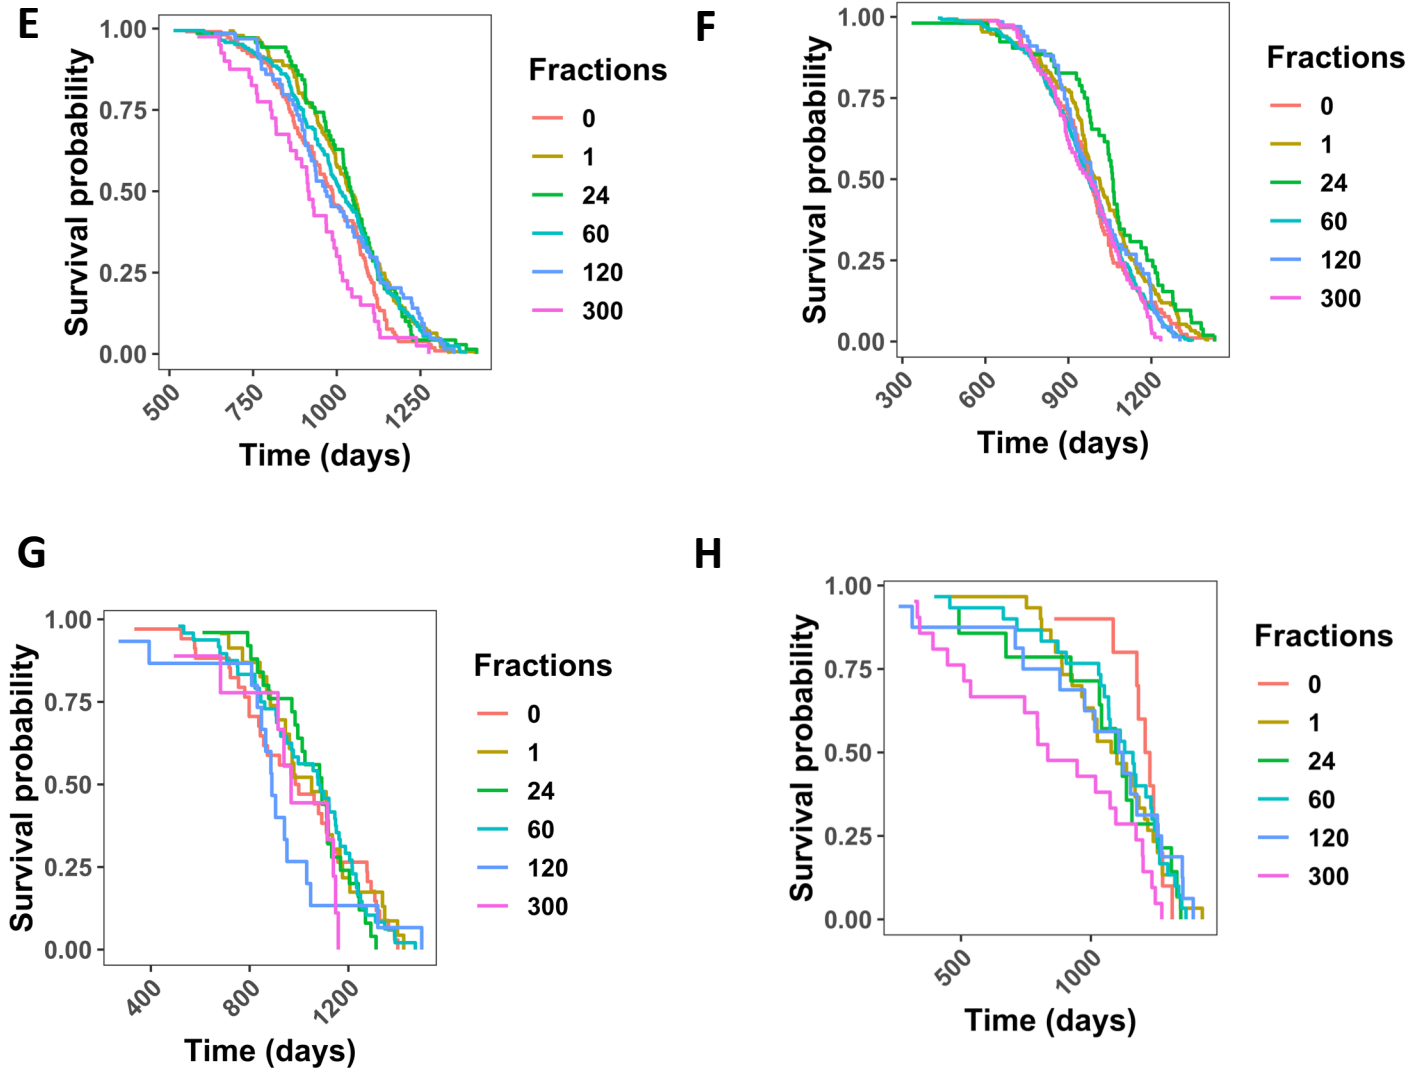

**Supplementary Figure S2:** Survival probability output from Cox PH model with sex and the number of fractions as a categorical variable control mice **(A/B)**. The predicted outcomes shown **(A)** are for male mice. Kaplan Meier curve for control mice showing differences in survival probability based on the number of fractions used during sham irradiation treatment **(C)**. Kaplan Meier curves showing how the number of fractions impacts survival in control male mice that died of solid tumors (excluding lung tumors) **(D)**, lung tumors **(E)**, lymphomas **(F)**, non-tumor diseases **(G)**, and CDU **(H)**.

# Supplementary Figure S3: Robustness tests for main model

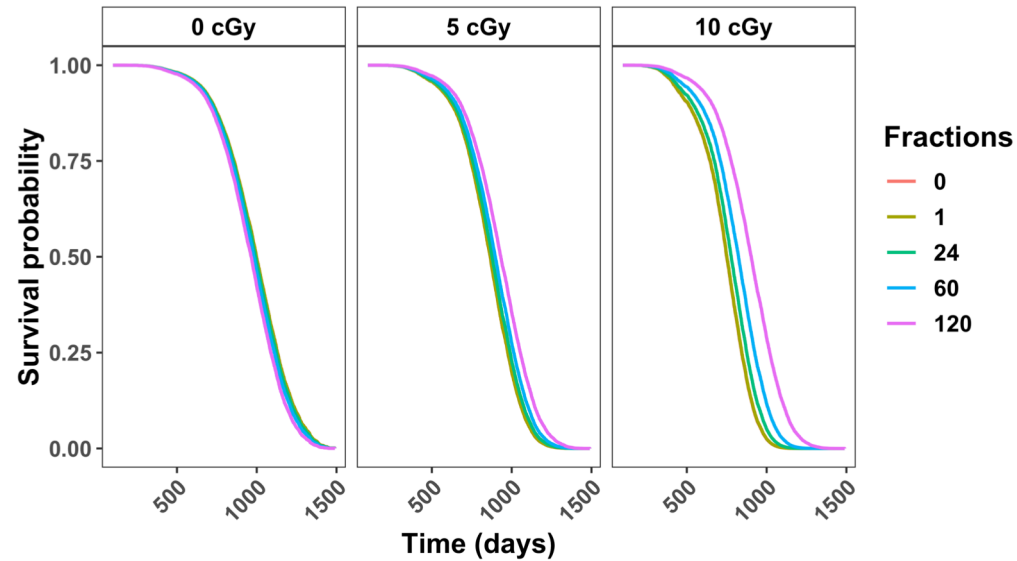

**B**

| Independent Variable | Estimate | Hazard Ratio (95% CI)   | P-value |
|----------------------|----------|-------------------------|---------|
| sexM                 | -0.157   | 0.85 (0.81, 0.90)       | <0.001  |
| Fractions            | 0.002    | 1.002 (1.002, 1.003)    | 0.002   |
| Total Dose           | 0.167    | 1.18 (1.17, 1.19)       | <0.001  |
| First Irradiated     | 0        | 0.9996 (0.9994, 0.9999) | 0.001   |
| Fractions:Total Dose | -0.001   | 0.999 (0.999, 0.999)    | <0.001  |

**Supplementary Figure S3:** Robustness testing for gamma irradiation main model. CoxPH model output from the base model with the following changes: **(A/B)** including mice irradiated at all ages, **(C/D)** stratifying by sex, **(E/F)** treating fractions as a categorical variable, **(G/H)** including exact fraction number and age first irradiated for control samples, **(I/J)** including mice with total dose received in 300 fractions, **(K/L)** including mice with total dose received in 300 fractions and fractions treated as a categorical variable, and **(M/N)** including an interaction term between total dose and sex.. The graphs represent predicted outcomes for female mice first irradiated at 120 days.

# Supplementary Figure S3: Robustness tests for main model

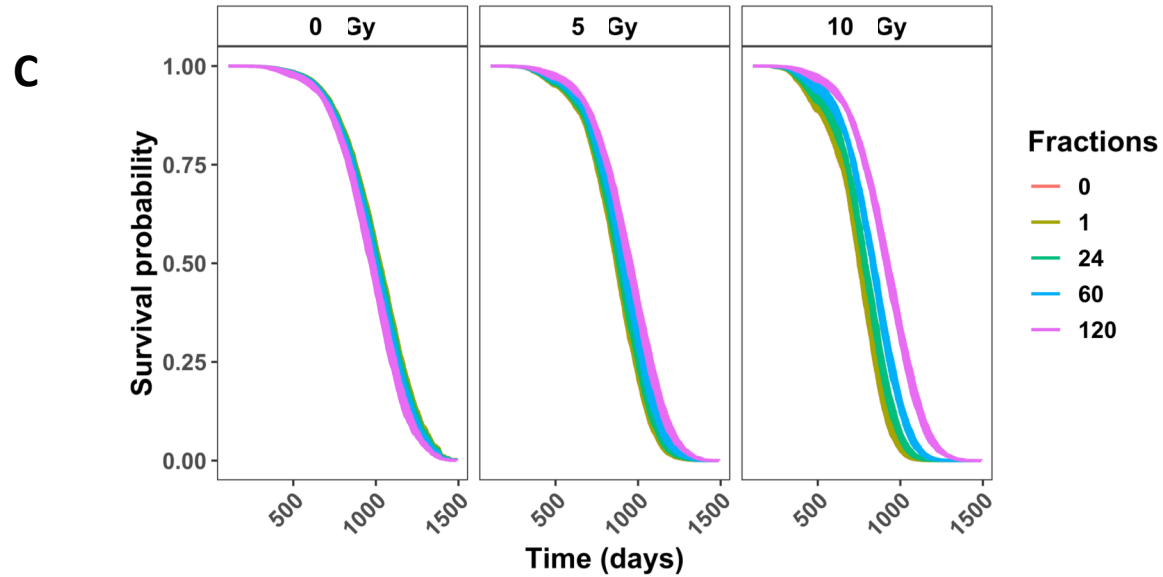

**D**

| Independent Variable | Estimate | Hazard Ratio (95% CI) | P-value          |
|----------------------|----------|-----------------------|------------------|
| Fractions            | 0.002    | 1.002 (1.001, 1.003)  | <b>0.001</b>     |
| Total Dose           | 0.169    | 1.18 (1.18, 1.19)     | <b>&lt;0.001</b> |
| First Irradiated     | -0.002   | 0.998 (0.996, 1.0004) | 0.124            |
| Fractions:Total Dose | -0.001   | 0.999 (0.999, 0.999)  | <b>&lt;0.001</b> |

**Supplementary Figure S3:** Robustness testing for gamma irradiation main model. CoxPH model output from the base model with the following changes: **(A/B)** including mice irradiated at all ages, **(C/D)** stratifying by sex, **(E/F)** treating fractions as a categorical variable, **(G/H)** including exact fraction number and age first irradiated for control samples, **(I/J)** including mice with total dose received in 300 fractions, **(K/L)** including mice with total dose received in 300 fractions and fractions treated as a categorical variable, and **(M/N)** including an interaction term between total dose and sex.. The graphs represent predicted outcomes for female mice first irradiated at 120 days.

# Supplementary Figure S3: Robustness tests for main model

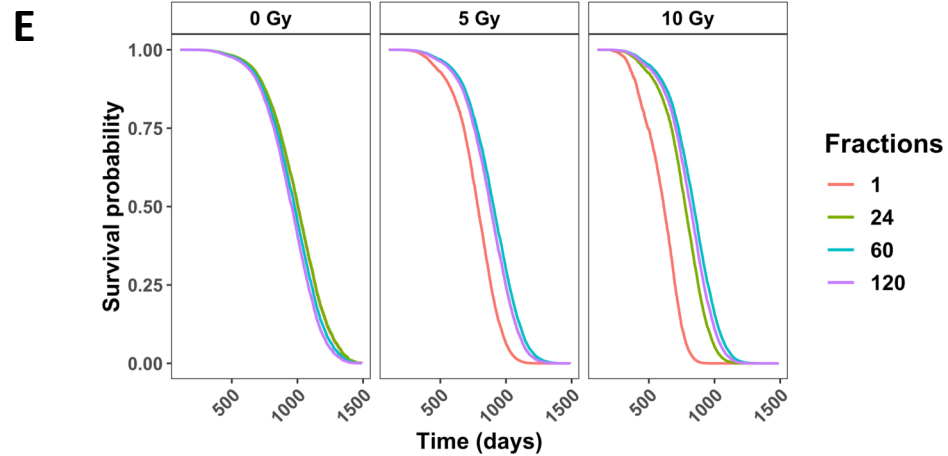

**F**

| Independent Variable      | Estimate | Hazard Ratio (95% CI) | P-value          |
|---------------------------|----------|-----------------------|------------------|
| Sex                       | -0.203   | 0.82 (0.77, 0.86)     | <b>&lt;0.001</b> |
| Fractions 24              | -0.015   | 0.99 (0.88, 1.10)     | 0.79             |
| Fractions 60              | 0.143    | 1.15 (1.04, 1.28)     | <b>0.007</b>     |
| Fractions 120             | 0.27     | 1.31 (1.094, 1.57)    | <b>0.003</b>     |
| Total Dose                | 0.278    | 1.32 (1.228, 1.42)    | <b>&lt;0.001</b> |
| First Irradiated          | -0.007   | 0.99 (0.991, 0.996)   | <b>&lt;0.001</b> |
| Fractions 24: Total Dose  | -0.132   | 0.88 (0.82, 0.94)     | <b>&lt;0.001</b> |
| Fractions 60: Total Dose  | -0.193   | 0.82 (0.77, 0.89)     | <b>&lt;0.001</b> |
| Fractions 120: Total Dose | -0.188   | 0.83 (0.77, 0.89)     | <b>&lt;0.001</b> |

**Supplementary Figure S3:** Robustness testing for gamma irradiation main model. CoxPH model output from the base model with the following changes: **(A/B)** including mice irradiated at all ages, **(C/D)** stratifying by sex, **(E/F)** treating fractions as a categorical variable, **(G/H)** including exact fraction number and age first irradiated for control samples, **(I/J)** including mice with total dose received in 300 fractions, **(K/L)** including mice with total dose received in 300 fractions and fractions treated as a categorical variable, and **(M/N)** including an interaction term between total dose and sex.. The graphs represent predicted outcomes for female mice first irradiated at 120 days.

# Supplementary Figure S3: Robustness tests for main model

**G**

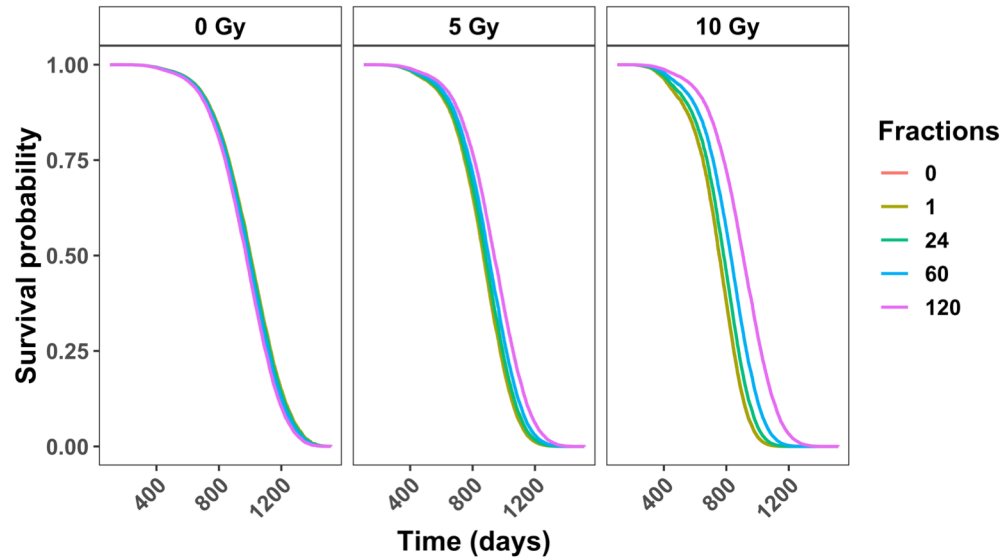

**H**

| Independent Variable | Estimate | Hazard Ratio (95% CI)  | P-value |
|----------------------|----------|------------------------|---------|
| SexM                 | -0.149   | 0.86 (0.83, 0.90)      | <0.001  |
| Total Dose           | 0.001    | 1.001 (1.001, 1.002)   | <0.001  |
| First Irradiated     | 0.168    | 1.18 (1.18, 1.19)      | <0.001  |
| Fractions:Total Dose | -0.002   | 0.998 (0.996, 0.9996)  | 0.017   |
| Fractions            | -0.001   | 0.999 (0.9990, 0.9991) | <0.001  |

**Supplementary Figure S3:** Robustness testing for gamma irradiation main model. CoxPH model output from the base model with the following changes: **(A/B)** including mice irradiated at all ages, **(C/D)** stratifying by sex, **(E/F)** treating fractions as a categorical variable, **(G/H)** including exact fraction number and age first irradiated for control samples, **(I/J)** including mice with total dose received in 300 fractions, **(K/L)** including mice with total dose received in 300 fractions and fractions treated as a categorical variable, and **(M/N)** including an interaction term between total dose and sex.. The graphs represent predicted outcomes for female mice first irradiated at 120 days.

# Supplementary Figure S3: Robustness tests for main model

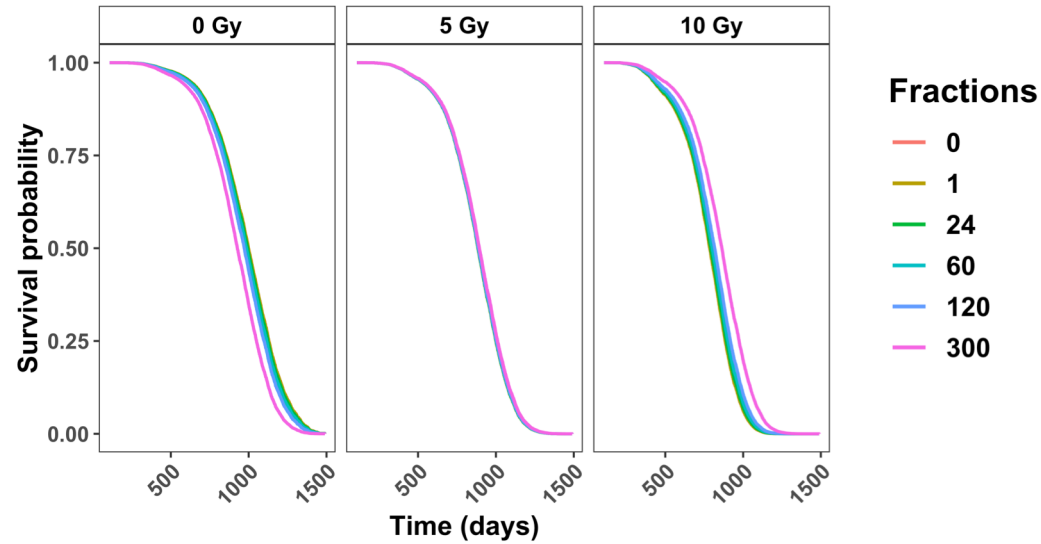

**J**

| Independent Variable (reference) | Estimate  | Hazard Ratio (95% CI)   | P-value |
|----------------------------------|-----------|-------------------------|---------|
| SexM                             | -0.182    | 0.834 (0.79, 0.88)      | <0.001  |
| Total Dose                       | 0.001     | 1.0014 (1.007, 1.0020)  | <0.001  |
| First Irradiated                 | 0.138     | 1.15 (1.14, 1.15)       | <0.001  |
| Fractions:Total Dose             | -0.002    | 0.996 (0.9955, 0.9997)  | 0.0221  |
| Fractions                        | -3.16E-04 | 0.9997 (0.9996, 0.9997) | <0.001  |

**Supplementary Figure S3:** Robustness testing for gamma irradiation main model. CoxPH model output from the base model with the following changes: **(A/B)** including mice irradiated at all ages, **(C/D)** stratifying by sex, **(E/F)** treating fractions as a categorical variable, **(G/H)** including exact fraction number and age first irradiated for control samples, **(I/J)** including mice with total dose received in 300 fractions, **(K/L)** including mice with total dose received in 300 fractions and fractions treated as a categorical variable, and **(M/N)** including an interaction term between total dose and sex.. The graphs represent predicted outcomes for female mice first irradiated at 120 days.



# Supplementary Figure S3: Robustness tests for main model

**K**

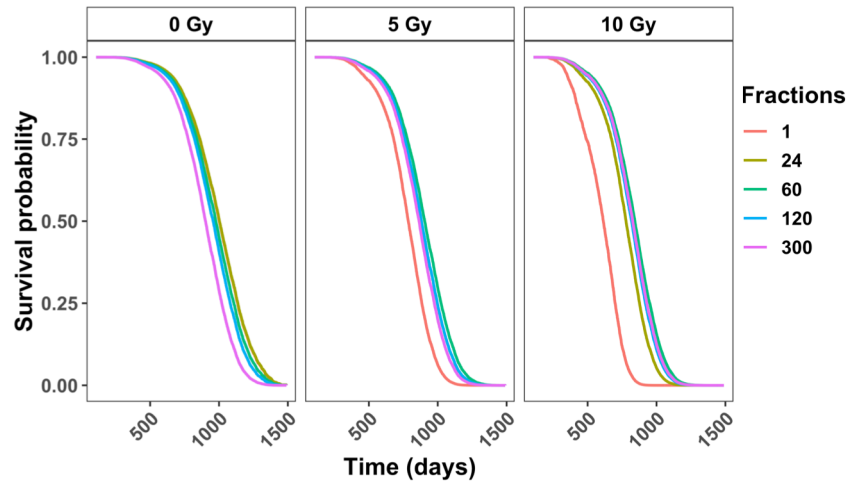

**L**

| Independent Variable (reference) | Estimate | Hazard Ratio (95% CI) | P-value |
|----------------------------------|----------|-----------------------|---------|
| SexM                             | -0.203   | 0.817 (0.77, 0.86)    | <0.001  |
| Fractions 24                     | -0.008   | 0.992 (0.89, 1.11)    | 0.885   |
| Fractions 60                     | 0.145    | 1.16 (1.04, 1.28)     | 0.0059  |
| Fractions 120                    | 0.270    | 1.31 (1.09, 1.57)     | 0.0035  |
| Fractions 300                    | 0.59     | 1.81 (1.46, 2.25)     | <0.001  |
| Total Dose                       | 0.279    | 1.32 (1.23, 1.42)     | <0.001  |
| First Irradiated                 | -0.007   | 0.994 (0.991, 0.996)  | <0.001  |
| Fractions 24: Total Dose         | -0.133   | 0.88 (0.81, 0.94)     | 0.0003  |
| Fractions 60: Total Dose         | -0.194   | 0.82 (0.77, 0.89)     | <0.001  |
| Fractions 120: Total Dose        | -0.189   | 0.83 (0.77, 0.89)     | <0.001  |
| Fractions 300: Total Dose        | -0.227   | 0.80 (0.74, 0.86)     | <0.001  |

**Supplementary Figure S3:** Robustness testing for gamma irradiation main model. CoxPH model output from the base model with the following changes: **(A/B)** including mice irradiated at all ages, **(C/D)** stratifying by sex, **(E/F)** treating fractions as a categorical variable, **(G/H)** including exact fraction number and age first irradiated for control samples, **(I/J)** including mice with total dose received in 300 fractions, **(K/L)** including mice with total dose received in 300 fractions and fractions treated as a categorical variable, and **(M/N)** including an interaction term between total dose and sex. The graphs represent predicted outcomes for female mice first irradiated at 120 days.

# Supplementary Figure S3: Robustness tests for main model

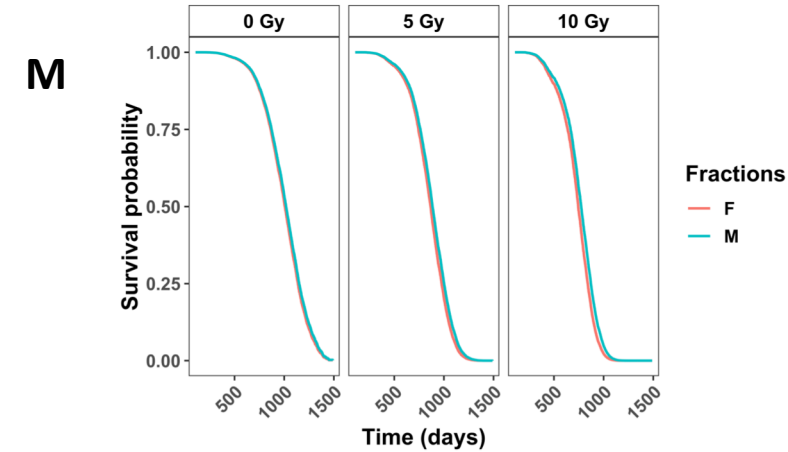

**N**

| Independent Variable | Estimate | Hazard Ratio (95% CI)   | P-value      |
|----------------------|----------|-------------------------|--------------|
| SexM                 | -0.07    | 0.93 (0.87588, 0.99347) | <b>0.03</b>  |
| Total Dose           | 17.4     | 3.77E7 (1.79E, 7.95E7)  | <b>0</b>     |
| Fractions            | 0.002    | 1.0015 (1.07, 1.003)    | <b>0.007</b> |
| First Irrad          | -0.002   | 0.998(0.996, 1.0003)    | 0.102        |
| SexM:Total Dose      | -1.552   | 0.21 (0.122, 0.367)     | <b>0</b>     |
| Total Dose:Fractions | -0.107   | 0.898 (0.88, 0.91)      | <b>0</b>     |

**Supplementary Figure S3:** Robustness testing for gamma irradiation main model. CoxPH model output from the base model with the following changes: **(A/B)** including mice irradiated at all ages, **(C/D)** stratifying by sex, **(E/F)** treating fractions as a categorical variable, **(G/H)** including exact fraction number and age first irradiated for control samples, **(I/J)** including mice with total dose received in 300 fractions, **(K/L)** including mice with total dose received in 300 fractions and fractions treated as a categorical variable, and **(M/N)** including an interaction term between total dose and sex. The graphs represent predicted outcomes for female mice first irradiated at 120 days.

# Supplementary Figure S4: KM curves for control and gamma irradiated mice to validate Cox Proportional Hazards model

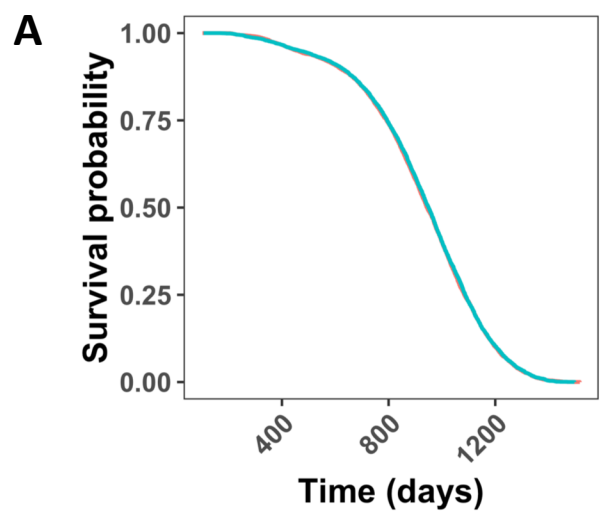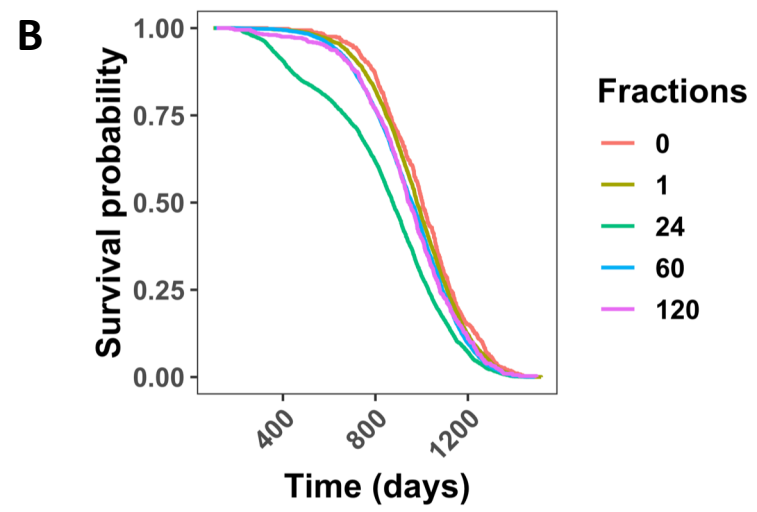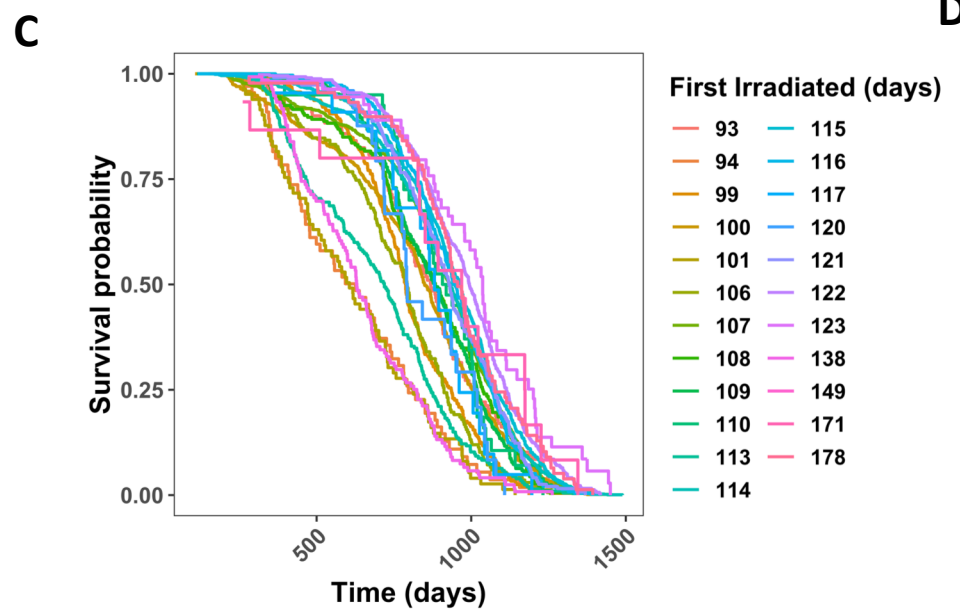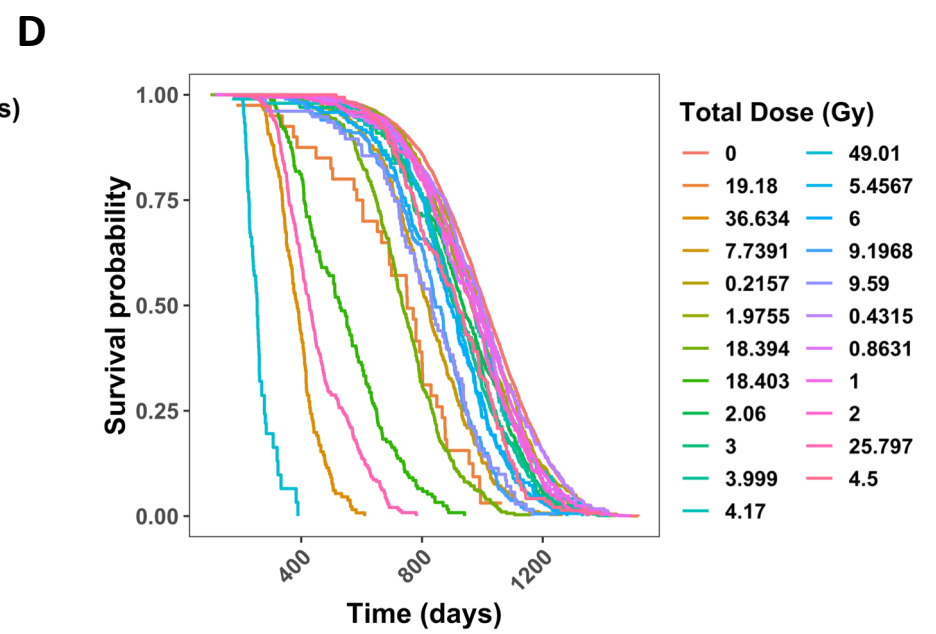

**Supplementary Figure S4:** Kaplan Meier curves showing survival probability vs. time in gamma irradiated and control mice after the filtering shown in Table 1 and removing mice first irradiated after 500 days. KM curves compare **(A)** sex, **(B)** number of fractions, **(C)** age first irradiated, and **(D)** total dose.

# Supplementary Figure S5: Cause specific hazards for lung tumors, non-thymic lymphomas, and tumors (excluding lung tumors)

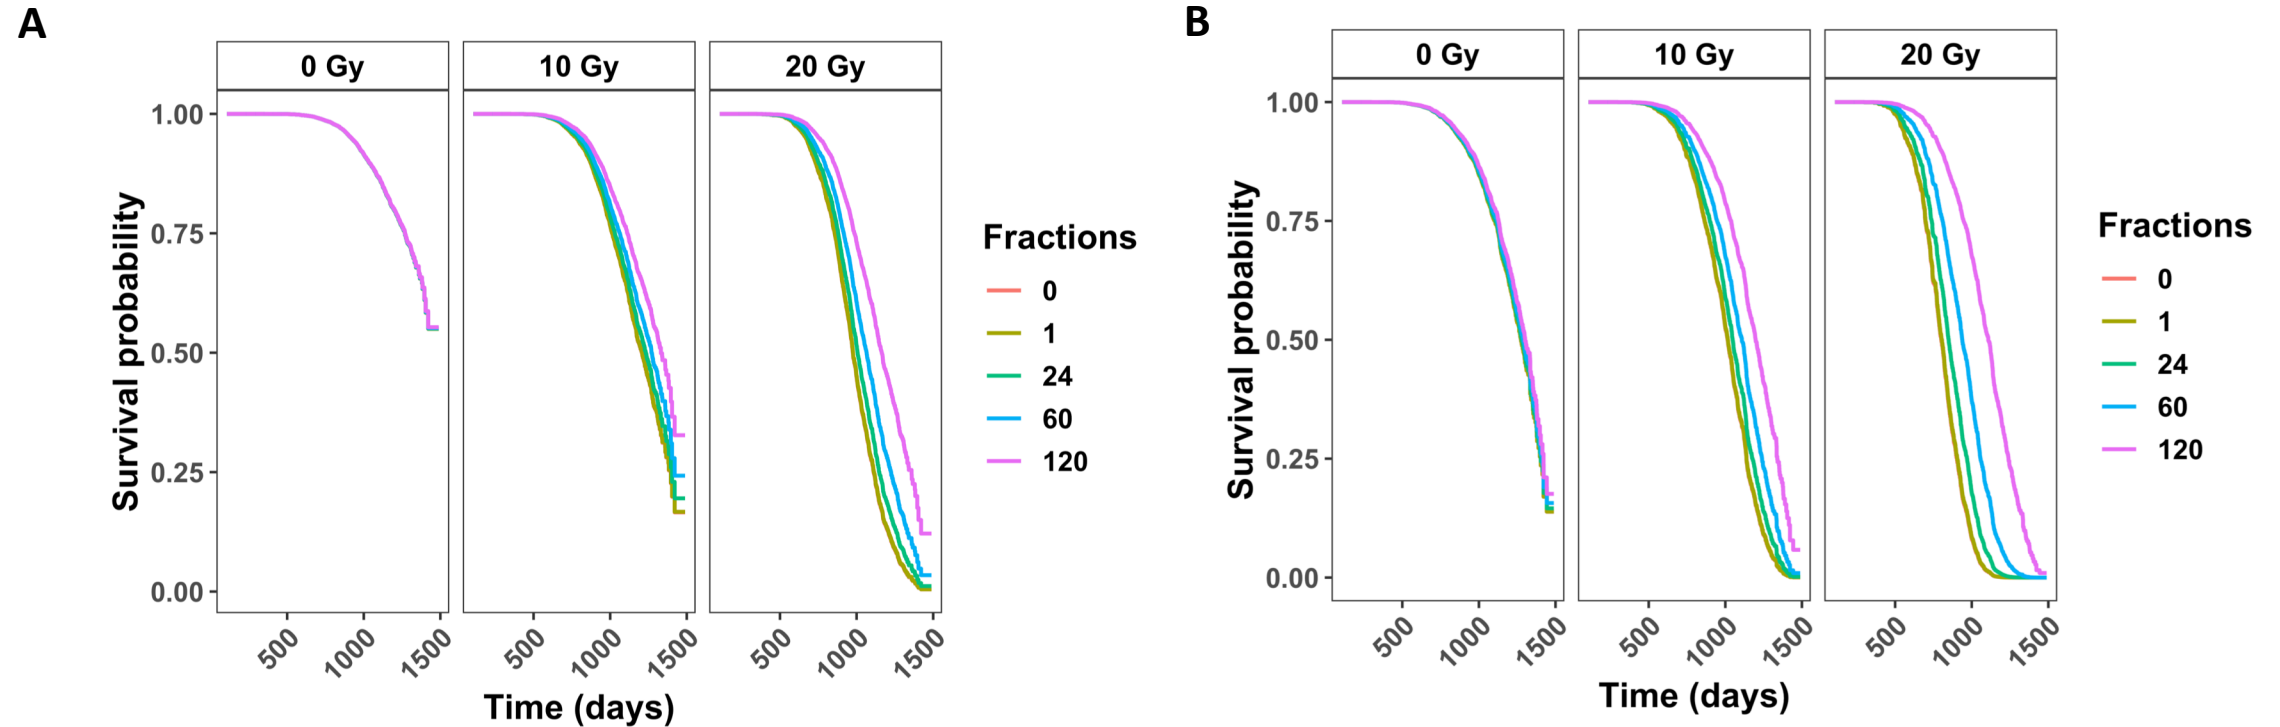

**Supplementary Figure S5:** Competing risks models for specific causes of death in gamma irradiated mice with age as a time scale and sex, age first irradiated, total dose, fractions, and the interaction between total dose and fractions as independent variables. Survival curves for cause of death being **(A)** lung tumors, **(B)** all tumors (excluding lung tumors), and **(C)** non-thymic lymphomas. The corresponding model output with parameter estimates, hazard ratios with a 95% confidence interval, and p-values are listed in **table 2** for lung tumors and all tumors (excluding lung tumors). **(D)** Model output for non-thymic lymphoma. The graphs represent predicted outcomes for female mice first irradiated at 120 days.

# Supplementary Figure S5: Cause specific hazards for lung tumors, non-thymic lymphomas, and tumors (excluding lung tumors)

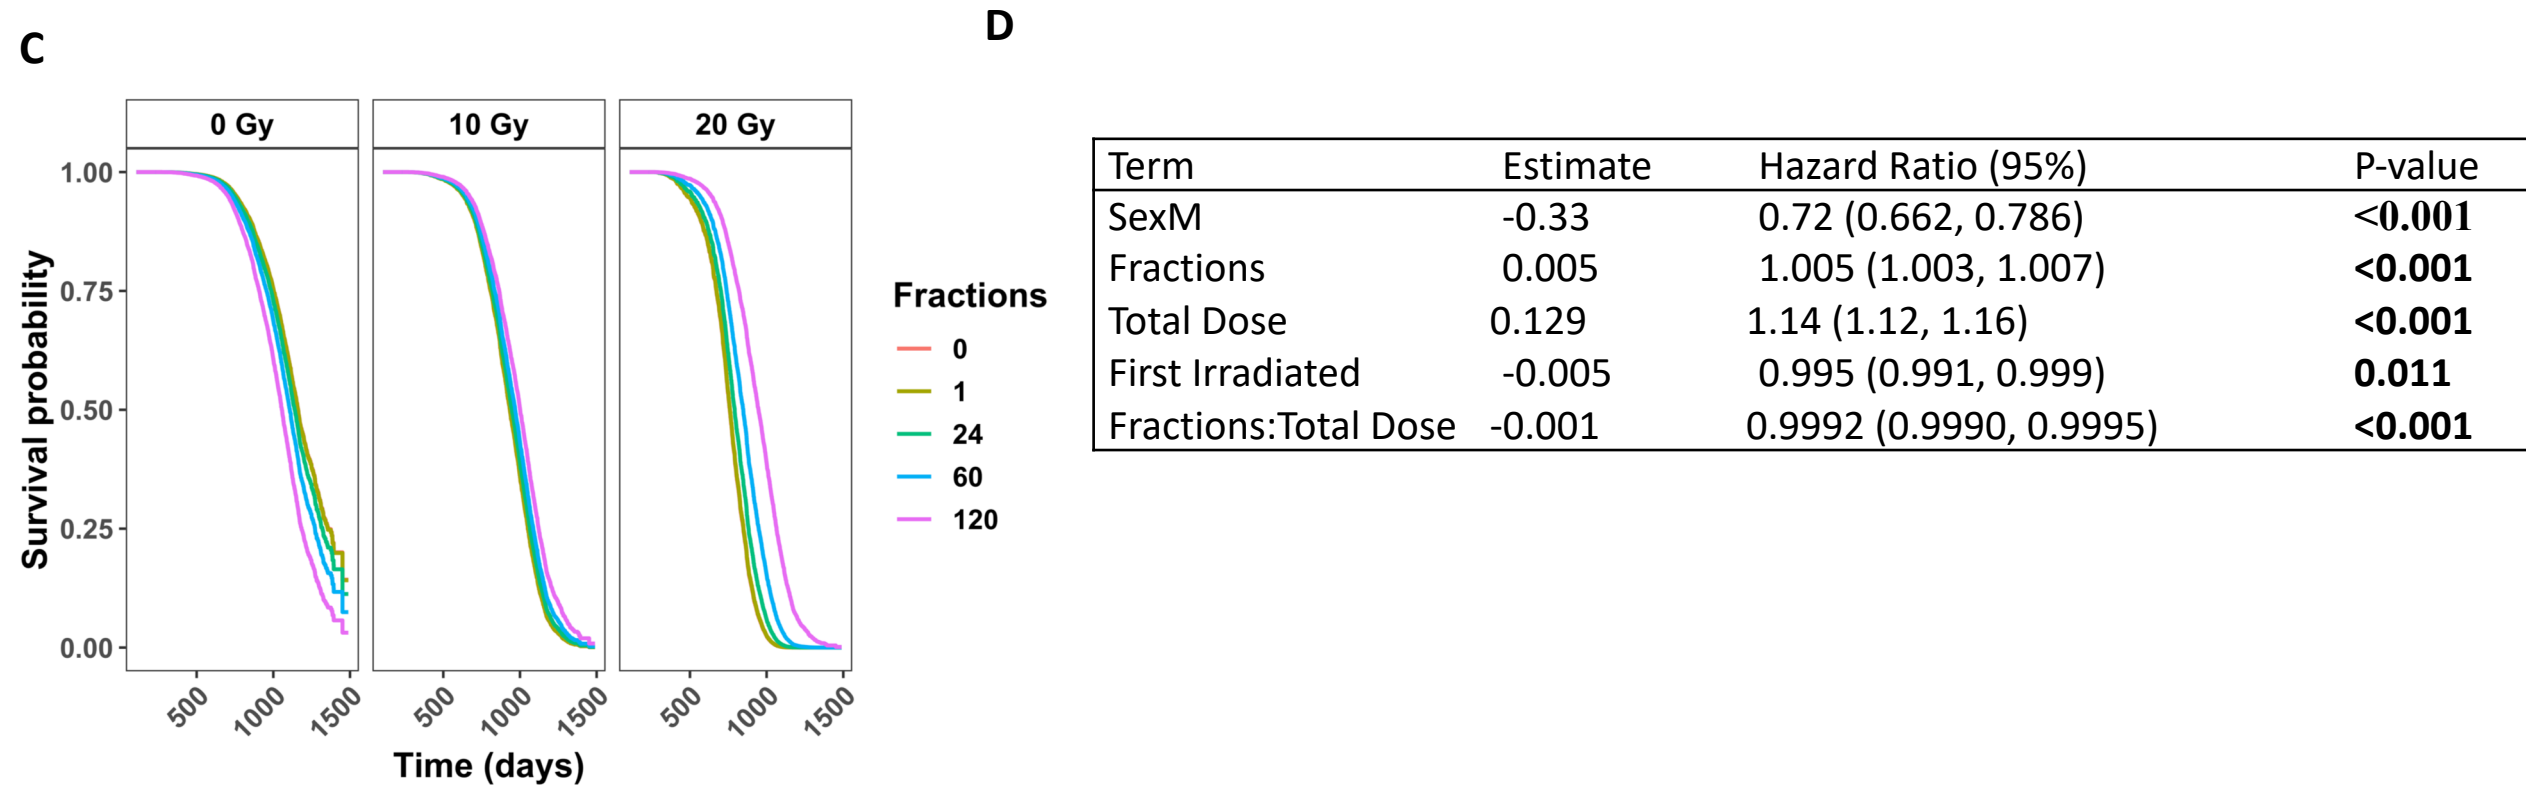

**Supplementary Figure S5:** Competing risks models for specific causes of death in gamma irradiated mice with age as a time scale and sex, age first irradiated, total dose, fractions, and the interaction between total dose and fractions as independent variables. Survival curves for cause of death being **(A)** lung tumors, **(B)** all tumors (excluding) lung tumors, and **(C)** non-thymic lymphomas. The corresponding model output with parameter estimates, hazard ratios with a 95% confidence interval, and p-values are listed in **table 2** for lung tumors and all tumors (excluding lung tumors). **(D)** Model output for non-thymic lymphoma. The graphs represent predicted outcomes for female mice first irradiated at 120 days.

# Supplementary Figure S6: CIF with a dose cutoff of 6Gy

**A**

| Variable             | Parameter Estimate | Hazard Ratio (95% CI) | P-value          |
|----------------------|--------------------|-----------------------|------------------|
| SexM                 | -0.423             | 0.655 (0.57, 0.75)    | <b>&lt;0.001</b> |
| Fractions            | 0.043              | 1.044 (0.978, 1.113)  | 0.2              |
| Total Dose           | -1.30E-03          | 0.999 (0.998, 0.999)  | <b>&lt;0.001</b> |
| First Irradiated     | -3.73E-03          | 0.996 (0.993, 1.000)  | 0.07             |
| Fractions:Total Dose | 0.001              | 1.001 (0.999, 1.002)  | 0.32             |

**C**

| Variable             | Parameter Estimate | Hazard Ratio (95% CI) | P-value          |
|----------------------|--------------------|-----------------------|------------------|
| SexM                 | 1.26               | 3.524 (3.04, 4.08)    | <b>&lt;0.001</b> |
| Fractions            | 0.016              | 1.016 (0.954, 1.083)  | 0.62             |
| Total Dose           | 2.14E-04           | 1.000 (1.000, 1.00)   | .45              |
| First Irradiated     | -3.23E-03          | 0.997 (0.993, 1.00)   | 0.094            |
| Fractions:Total Dose | 0.001              | 1.001 (0.999, 1.002)  | 0.32             |

**B**

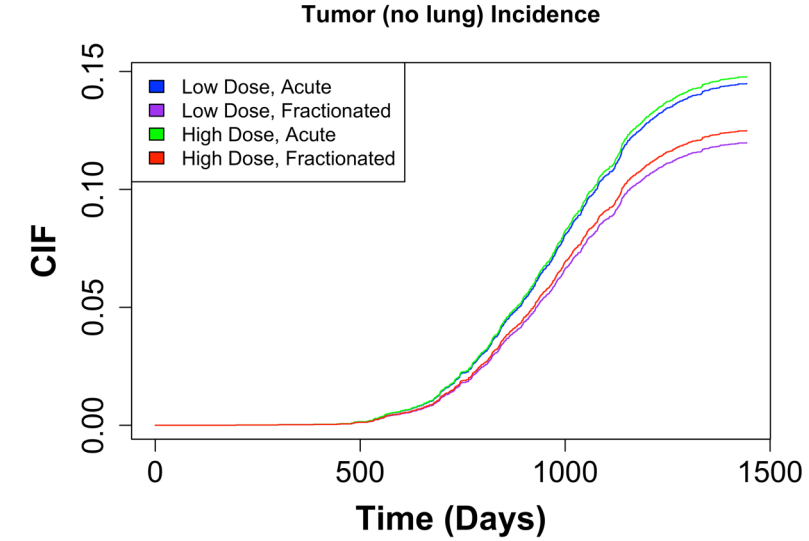

**D**

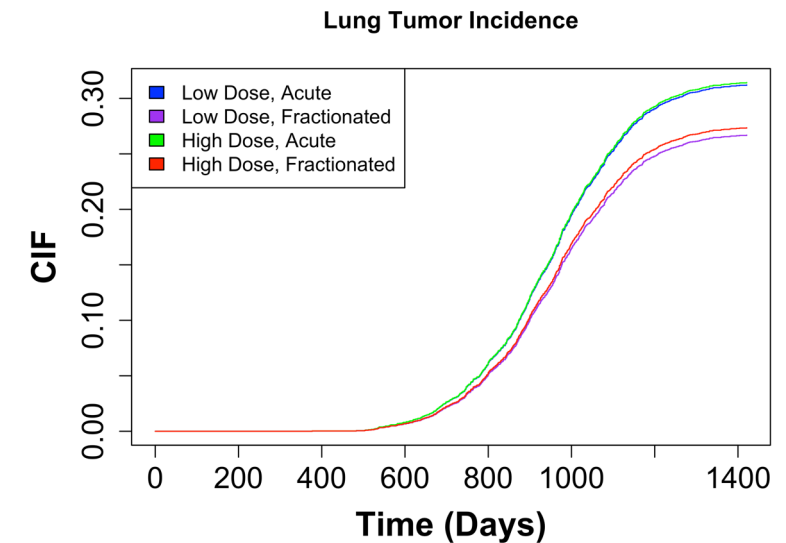

**Supplementary Figure S6:** CIF regression model output using a total dose cutoff of 6Gy for tumor (no lung) (**A**), lung tumor (**C**), lymphoma (**E**), and non-tumor deaths (**G**). Predicted output from CIF model for tumor (no lung) (**B**), lung tumor (**D**), lymphoma (**F**), and non-tumor deaths (**H**). All predicted outputs represent males first irradiated at 120 days under the following conditions: low dose = 0.1Gy, high dose = 6Gy, acute = 1 fraction, fractionated = 60 fractions.

# Supplementary Figure S6: CIF with a dose cutoff of 6Gy

**E**

| Variable             | Parameter Estimate | Hazard Ratio (95% CI) | P-value          |
|----------------------|--------------------|-----------------------|------------------|
| SexM                 | -0.276             | 0.759 (0.69, 0.83)    | <b>&lt;0.001</b> |
| Fractions            | -0.023             | 0.977 (0.936, 1.02)   | 0.29             |
| Total Dose           | -2.23E-04          | 1.000 (0.999, 1.00)   | 0.36             |
| First Irradiated     | 6.25E-03           | 1.006 (1.004, 1.01)   | <b>&lt;0.001</b> |
| Fractions:Total Dose | -0.001             | 0.999 (0.998, 1)      | <b>0.014</b>     |

**G**

| Variable             | Parameter Estimate | Hazard Ratio (95% CI) | P-value          |
|----------------------|--------------------|-----------------------|------------------|
| SexM                 | -0.342             | 0.71 (0.608, 0.83)    | <b>&lt;0.001</b> |
| Fractions            | 0.118              | 1.126 (1.049, 1.207)  | <b>0.001</b>     |
| Total Dose           | 0.001              | 1.001 (1, 1.001)      | 0.15             |
| First Irradiated     | -0.01              | 0.99 (0.985, 0.995)   | <b>&lt;0.001</b> |
| Fractions:Total Dose | 0.001              | 1.001 (0.999, 1.003)  | 0.28             |

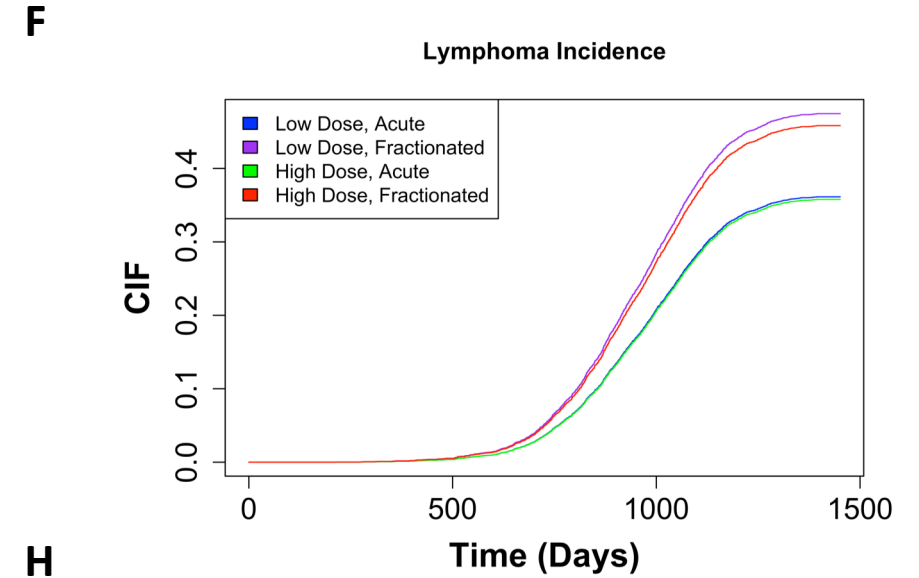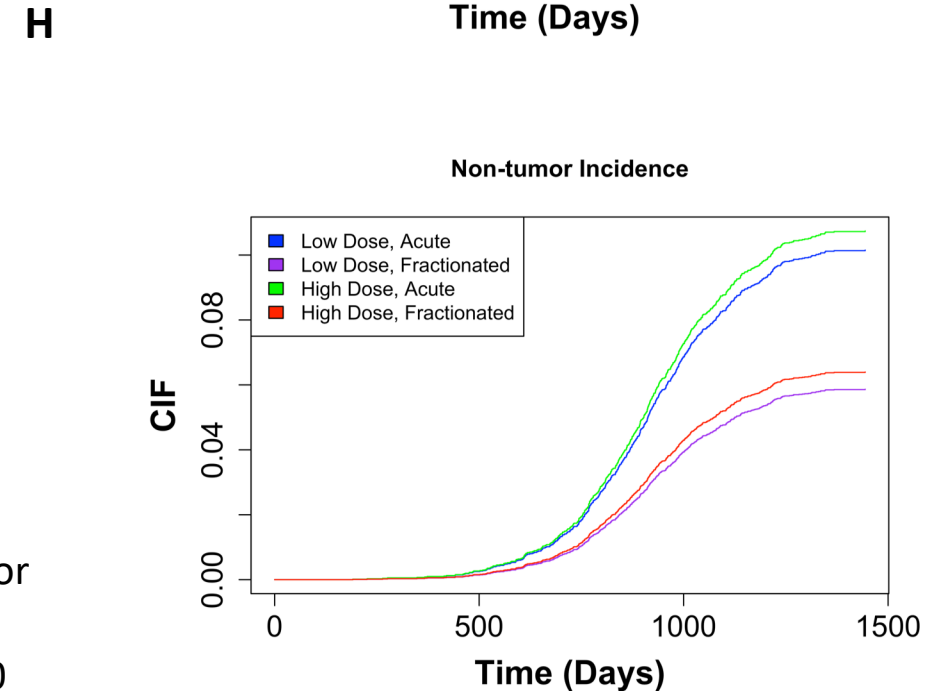

**Supplementary Figure S6:** CIF regression model output using a total dose cutoff of 6Gy for tumor (no lung) (A), lung tumor (C), lymphoma (E), and non-tumor deaths (G). Predicted output from CIF model for tumor (no lung) (B), lung tumor (D), lymphoma (F), and non-tumor deaths (H). All predicted outputs represent males first irradiated at 120 days under the following conditions: low dose = 0.1Gy, high dose = 6Gy, acute = 1 fraction, fractionated = 60 fractions.
